# Supplementary material for: RNA Dynamics by NMR Spectroscopy
Source: PubMed Central journal article supplement — Chembiochem. 2019 Jul 17;20(21):2685–710. doi: 10.1002/cbic.201900072 (PMC6899578; doi:10.1002/cbic.201900072), 2019-07-17
Supplement: CBIC-20-2685-s001.pdf [file CBIC-20-2685-s001.pdf]

**Author Contributions**

*K.P. Conceptualization: Lead; Project administration: Lead; Supervision: Lead; Writing - Original Draft: Supporting; Writing - Review & Editing: Equal.*
